# Supplementary material for: Generation of anti-Notch antibodies and their application in blocking Notch signalling in neural stem cells
Source: PubMed Central journal article supplement (PMC3502869; doi:10.1016/j.ymeth.2012.07.008), 2012-09

# Supplementary figure 3

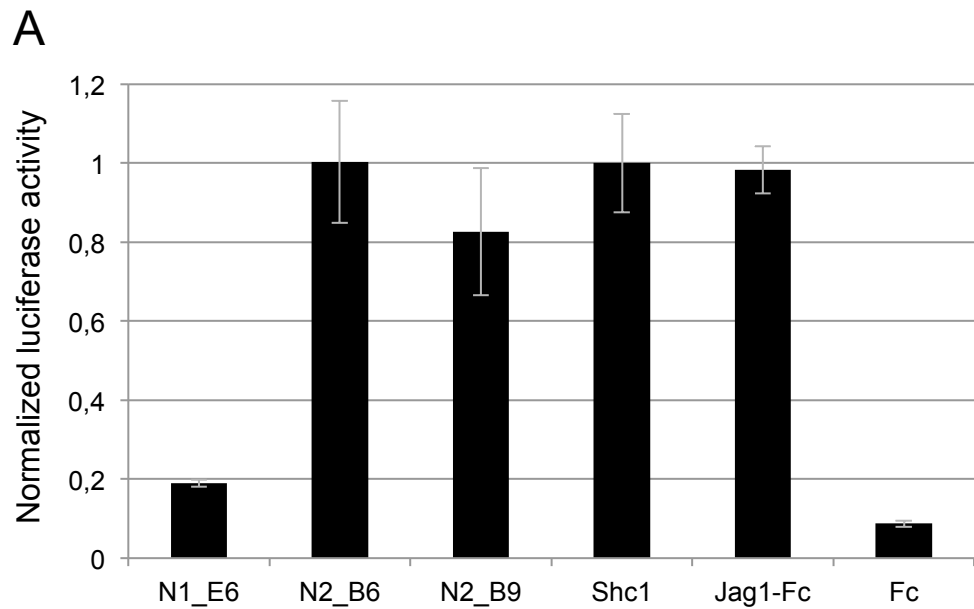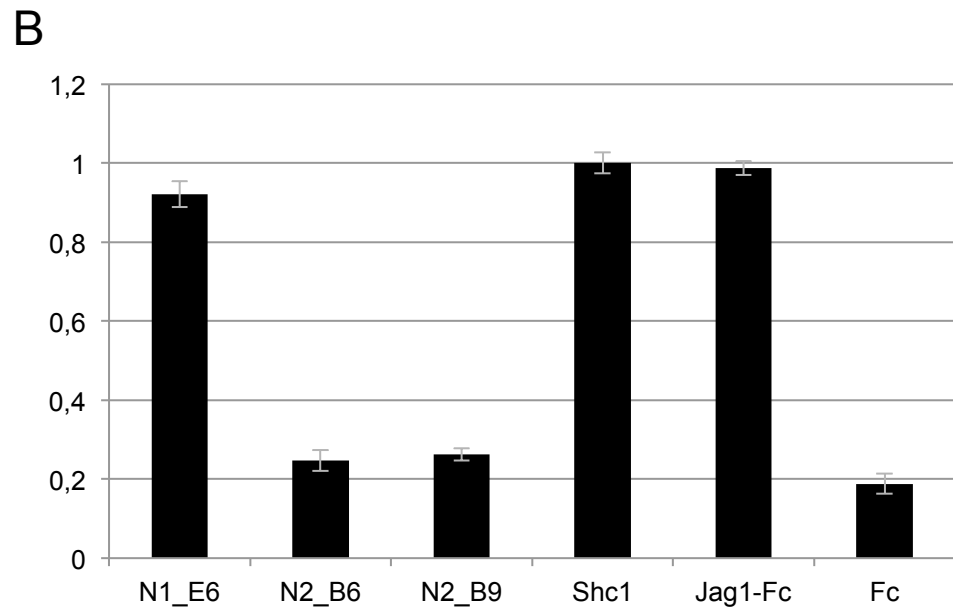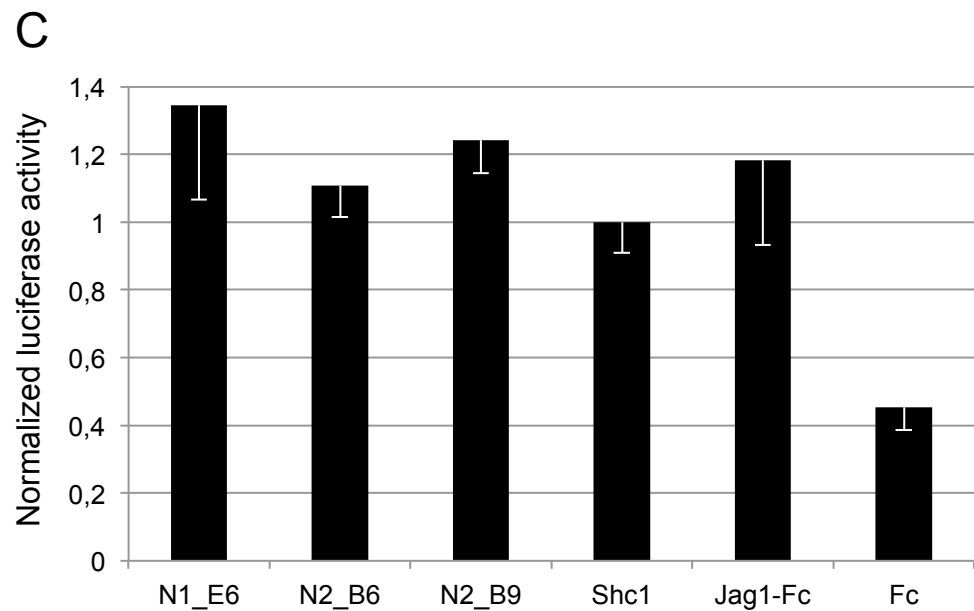

Supplement: mmc3.pdf [file mmc3.pdf]
