# Supplementary material for: Generation of anti-Notch antibodies and their application in blocking Notch signalling in neural stem cells
Source: PubMed Central journal article supplement (PMC3502869; doi:10.1016/j.ymeth.2012.07.008), 2012-09
Supplement: mmc4.pdf [file mmc4.pdf]

# Supplementary figure 4

A

```

hNRR1 (1) --DYSFGGCAGRDIPFPLIEEACELP---ECOEDAGNKVCSLQCNNHACCWGGDCSLNFNDPWKNCQTQSLOCWKYFSDGHCDSSQCNSAGCLFDGFDCQ-
mNRR1 (1) --DYSFTGCAGRDIPFPQIEEACELP---ECOVDAGNKVCNLQCNNHACCWGGDCSLNFNDPWKNCQTQSLOCWKYFSDGHCDSSQCNSAGCLFDGFDCQ-
hNRR2 (1) -----TAPFSTFPATCLSQ---YCADKARDGVCDEACNSHACQWDGGDCSLTMENPWANCSSPLPCWDYINN-QCDELONTVECLFDNFECQ-
mNRR2 (1) PPSFGGSHCELYTAPTSTFPATCQSQ---YCADKARDGICDEACNSHACQWDGGDCSLTMDPWANCTSTLRCWEYINN-QCDEQCN TAECLFDNFECQ-
hNRR3 (1) -----RCEAPAAAPEVSEEPKPCRA---ACQAKRGDQRCRECNTPGCGWDGGDCSLSVGDPWRQC-EALQCWRLFNNSRCDPACSSPACLYDNFDCYSA
mNRR3 (1) -----RCETPSAAPEVPEEPKPCRA---ACQAKRGDQNCRECNTPGCGWDGGDCSLNVDDPWWRQC-EALQCWRLFNNSRCDPACSSPACLYDNFDCYS
hNRR4 (1) ----LGGPFCFRCSCPHSSFGPKCQKPGAKGCEGRSGDGCADAGCSGPGGNWDGGDCSLGVDPWPKGCPSHSRCWLLFRDQCHPQCDSEECCLFDGYDCE-
mNRR4 (1) -----PGFQCTCFEIDSEFGPKCQRPGASGCEGRSGDGTCDAGCSGPGGNWDGGDCSLGVDPWPKGCPPHSCWLLFRDGRCHPQCDSEECCLFDGYDCE-

hNRR1 (95) -RAEGQCNELYDQYCKDHFS DGHC DQGCNSAECEWDGLDCAEHVPERLAAGTLV VVLMPEQLRNS SFHFLRELSRVLHTNVVFKRDAHGQOMIEPYYG
mNRR1 (95) -LTEGQCNELYDQYCKDHFS DGHC DQGCNSAECEWDGLDCAEHVPERLAAGTLV VVLLPPDQLRNS SFHFLRELSHVLHTNVVFKRDAQGQOMIEPYYG
hNRR2 (84) -GNSKTCCK--YDKYCADHFKNHCDQGCNSEECGWDGLDCAADQPENLAEGTLV I VVLMPEQLLQDARS FLRALGTLTLLHTNLRIRKQDSQGELM VYPYFG
mNRR2 (96) -RNSKTCCK--YDKYCADHFKNHCDQGCNSEECGWDGLDCAADQPENLAEGTLV I VVLLPEQLLQDSRS FLRALGTLTLLHTNLRIRKQDSQGALM VYPYFG
hNRR3 (91) GGRERTCNFVYEKYCADHFADGRC DQGCNTEECGWDGLDCASEVPALLARCVLVT VLLPPEELR S SADFLQRLSAILRSLRFRLDAGHGCAMVFPYHR
mNRR3 (91) GGRDRTCNFVYEKYCADHFADGRC DQGCNTEECGWDGLDCASEVPALLARCVLVT VLLPPEELR S SADFLQRLSAILRSLRFRLDARGCAMVFPYHR
hNRR4 (96) --TTPACTFAYDQYCHDFHNGHC EKGKNTAECEGWDGDCRPE DGDPEWGPSLAL LVVLSPPALDQLFALARVLSLTLRVGLVWRKDRDGRDMVYPYPG
mNRR4 (93) --IPLTCIFAYDQYCRDFHNGHC EKGKNTAECEGWDGDCRPE DGESEGRPSLAL LVVLRPPALDQLLALARVLSLTLRVGLVWRKDEGRNMVFPYPG

hNRR1 (194) REEELRKHPIKRAAEGWAAPDALLGQVKASLLPGGSEGRRRRELDPM D V RGSIVYLEIDNRQCVQA--SSQCFQSATDVA AFLGALASLGSINI FYKIE
mNRR1 (194) HEEELRKHPIKRSTV GWAT-----S--SLLPGTS--GGRQRRELDPM DIRGSIVYLEIDNRQCVQS--SSQCFQSATDVA AFLGALASLGSINI FYKIE
hNRR2 (181) E-----KSAAMKKQR-----MTRRSLPGEQEQE-----VAGSKVLEIDNRQCVQD--SDHCFKNTDAAAALLASHAIQGTLSYFLVSV
mNRR2 (193) E-----KSAAMKKQK-----MTRRSLPEEQEQEQE---VIGSKVLEIDNRQCVQD--SDQCFKNTDAAAALLASHAIQGTLSYFLVSV
hNRR3 (191) P-----SPGSE--PRRRELAP--EVIGSVVMLEIDNRLCLQSPENDHCFPDAQSAADYLGATSAVERLDFEYELR
mNRR3 (191) P-----SPGSE--SRVRELGP--EVIGSVVMLEIDNRLCLQSAENDHCFPDAQSAADYLGATSAVERLDFEYELR
hNRR4 (194) ARAEEKLGGTRDPTYQER-----AAPQTQPLGKETDSL S---AGFVVVMGVDL SRCGPDHPASRCPWD PGLLLRFLAAMA AVGALEPLL EGP
mNRR4 (191) TRAKEELSGARDSSSWER-----QAPPTQPLGKETESL G---AGFVVVMGVDL SRCGPEHPASRCPWD SGLLLRFLAAMA AVGALEPLL EGP

hNRR1 (292) AVQSEITVPEPPEAQ-
mNRR1 (282) AVKSEIVPEPPEL---
hNRR2 (253) VSESLTPERTQ----
mNRR2 (267) FSELSPRNAQ----
hNRR3 (258) DVRGEPLPEPES--
mNRR3 (258) DVRGEPLPEEQSV-
hNRR4 (278) LLAVHPHAGTAPP--
mNRR4 (275) LLAAHPQAGTRFSAN

```

B

|       | mNRR2 | mNRR3 | mNRR4 | hNRR1 | hNRR2 | hNRR3 | hNRR4 |
|-------|-------|-------|-------|-------|-------|-------|-------|
| mNRR1 | 46    | 48    | 33    | 90    | 44    | 45    | 33    |
| mNRR2 |       | 44    | 31    | 45    | 88    | 44    | 32    |
| mNRR3 |       |       | 38    | 43    | 44    | 94    | 35    |
| mNRR4 |       |       |       | 33    | 30    | 35    | 83    |
