# Supplementary material for: Generation of anti-Notch antibodies and their application in blocking Notch signalling in neural stem cells
Source: PubMed Central journal article supplement (PMC3502869; doi:10.1016/j.ymeth.2012.07.008), 2012-09
Supplement: mmc6.pdf [file mmc6.pdf]

# A

## Heavy chain variable domain (VH)

|       | FW1                             | CDR1    | FW2            | CDR2               | FW3                               | CDR3          | FW4        |
|-------|---------------------------------|---------|----------------|--------------------|-----------------------------------|---------------|------------|
| N1_E6 | QVQLQQSGPGLVKPSQTLSTLCAISGDSVSV | SNSAAWN | WIRQSPSRGLEWLG | RTYYRSKWYNDYAVSVKS | RITINPDTSKNQFSLQLNSVTPEDTAVYYCAR  | GGENWGFDFDY   | WGQGLVTVSS |
| N2_B6 | QVQLVQSGAEVKKPGASVKVSKASGYTFT   | SYAMH   | WVRQAPGQRLEWMG | WMNAGNGNTKYSQKFAQ  | RVTITRDTASASTAYMELSSLRSEDVAVYYCAR | DRVPTIPAYRIDY | WGQGLVTVSS |
| N2_B9 | -----                           | -----   | -----          | -I-----            | -----                             | GPRSYGAGGMDV  | -----      |

## Light chain variable domain (VL)

|       | FW1                      | CDR1          | FW2              | CDR2    | FW3                              | CDR3        | FW4         |
|-------|--------------------------|---------------|------------------|---------|----------------------------------|-------------|-------------|
| N1_E6 | QSVLTQPPSASGPPGQQRVTISC  | SGSRSNIGAYTVN | WYQHLPGTAPKVI IH | SNKQRP  | GVPDRFSGSKSGTSASLAITGLQAEDEADYYC | QSYDSRLRGWV | FGGGTKLTVLG |
| N2_B6 | DIQMTQSPSSVSASVGDRTVITTC | RASQGISSWLA   | WYQQKPKGAPRLLIY  | AASSLQS | GVPSRFSGSGSGTDFTLTISLQPEDFATYYC  | QQANSFPLT   | FGGGTKLEIKR |
| N2_B9 | -----                    | -----         | -----KF-----     | -----   | -----                            | -----       | -----V----- |

# B

## >N1\_E6\_scFv

CAGGTACAGCTGCAGCAGTCAGGTCCAGGACTGGTGAAGCCCTCGCAGACCCTCTCACTCACCTGTGCCATCTCCGGGGACAGTGTCTCTAGCAACAGTGTCTTGGAACTGGATCAGGCAGTCCCCATCGAGAGGCCTTGAGTGGCTGGGAAGGACATACTACAGGTCCAAGTGGTATAATGATTATGCAGTATCTGTGAAAAGTCGAATAACCATCAACCCAGACACATCCAAGAACCAGTTCGCCCTGCAGCTGAACCTCTGTGACTCCCAGGACACGGCTGTGTTACTGTGCAAGGGGGGGGAGAACTGGGATTCGGGTTTGGACTACTGGGGCCAGGGAACCCTGGTCACCGTCTCCTCACTCGAGGGTGGAGGGCGGTTAGCGGGAGGTGGCTCTGGCGGTGGCGCTAGCCAGTCTGTGCTGACTCAGCCACCCTCAGCGTCTGGGCCCCCGGGCAGAGGGTCACCATCTCGTGTCTGGAAGCAGGTCCAACATCGGGGCCATACTGTAAACTGGTACCAGCACCTCCCAGGGACGGCCCCAAAGTCATCATCCATAGTAATAAGCAGCGGCCCTCAGGGTCCCTGACCGATTCTCTGGCTCCAAGTCTGGCACCTCAGCCTCCCTGGCCATCACTGGGCTCAGGCTGAAGATGAGGCTGATTATTACTGCCAGTCGTATGACAGCAGGCTGCGCGGCTGGGTCTTCGGCGGAGGACCAAGCTGACCGTCTTAGT

## >N2\_B6\_scFv

CAGGTGCAGCTGGTGCAGTCTGGAGCTGAGGTGAAGAAGCCTGGGGCCTCAGTGAAGGTTTCTTGCAAGGCTTCTGGATACACCTTCACTAGCTATGCTATGCATTGGGTGCGCCAGGCCCCGGACAAAGGCTTGAGTGGATGGATGGATGAACGCTGGCAATGGTAACACAAAATATTACAGAAAGTCCAGGGCAGAGTCACCATTAACAGGGACACATCCGCGAGCACAGCCTACATGGAGCTGAGCAGCCTGAGATCTGAAGACACGGCTGTGTATTAAGTGTGAGGGATCGCGTGCCTACGATCCCGCCTATAGAATTGACTACTGGGGCCAGGGAACCCTGGTCCCGTCTCCTCACTCGAGGGTGGAGCGGTTAGCGCGAGGTGGCTCTGGCGGTGGCGCTAGCGACATCCAGATGACCCAGTCTCCATCTTCCGTGTCTGCATCTGTAGGAGACAGAGTCACCATCACTTGTTCGGGCGAGTCAGGTTATTAGCAGCTGGTTAGCCTGGTATCAGCAGAAACCAGGAAAAGCCCTAGGCTCCTGATCTATGCTGCATCCAGTTTGC AAAGTGGGGTCCCATCAAGGTTACAGCGCAGTGGATCTGGGACAGATTTCACTCTCACCATCAGCAGCCTGCAGCTGAAGATTTTGCAACTTACTATTGTCAACAGGCTAACAGTTTCCCGCTCACTTTCGGCGGAGGGACCAAGCTGGAGATCAAACGT

## >N2\_B9\_scFv

CAGGTCCAGCTTGTGCAGTCTGGGGCTGAGGTGAAGAAGCCTGGGGCCTCAGTGAAGGTTTCTTGCAAGGCTTCTGGATACACCTTCACTAGCTATGCTATGCATTGGGTGCGCCAGGCCCCGGACAAAGGCTTGAGTGGATGGATGGATGAACGCTGGCAATGGTAACACAAAATATTACAGAAAGTCCAGGGCAGAGTCACCATTAACAGGGACACATCCGCGAGCACAGCCTACATGGAGCTGAGCAGCCTGAGATCTGAAGACACGGCTGTGTATTAAGTGTGAGAGGGCCGAGGAGCTATGGCGCGGGCGGTATGGACGCTGGGGCCAAGGCACCCTGGTACCCTCTTCACTCGAGGGTGGAGCGGTTAGCGCGAGGTGGCTCTGGCGGTGGCGCTAGCGACATCCAGATGACCCAGTCTCCATCTTCTGTGTCTGCATCTGTAGGAGACAGAGTCACCATCACTTGTTCGGGCGAGTCAGGTTATTAGCAGCTGGTTAGCCTGGTATCAGCAGAAACCAGGAAAAGCCCTAAGTTCCTGATCTATGCTGCATCCAGTTTGC AAAAGTGGGGTCCCATCAAGGTTACAGCGCAGTGGATCTGGGACAGATTTCACTCTCACTATCAGCAGCCTGCAGCTGAAGATTTTGCAACTTACTATTGTCAACAGGCTAACAGTTTCCCGCTCACTTTCGGCGGAGGGACCAAGTGGAAATCAAACGT
