# Supplementary material for: Generation of anti-Notch antibodies and their application in blocking Notch signalling in neural stem cells
Source: PubMed Central journal article supplement (PMC3502869; doi:10.1016/j.ymeth.2012.07.008), 2012-09
Supplement: mmc7.pdf [file mmc7.pdf]

## Supplementary table 1.

| Gene name (Accession)    | Primer               | Sequence (given in 5' to 3' orientation) |
|--------------------------|----------------------|------------------------------------------|
| mouse Notch1 (NM_008714) | F mNRR1 <sup>a</sup> | CTTTCTACCGCTGTCTATGCCCC                  |
|                          | R mNRR1 <sup>a</sup> | GCCCACAAAGAACAGGAGCAC                    |
|                          | F mNRR1 <sup>D</sup> | AAAAAGCAGGCTCTGACTACAGCTTCACAGGTGGC      |
|                          | R mNRR1 <sup>a</sup> | AGAAAGCTGGGTTGGGCAGCGGAGGCTCC            |
|                          | F mNRR1dS1           | pho-GAGCTGGACCCCATGGACATC                |
|                          | R mNRR1dS1           | pho- CCCACCACTGGTACCAGGAAG               |
| mouse Notch2 (NM_010928) | F mNRR2 <sup>a</sup> | GTAACCCCTGCCAGCATGGG                     |
|                          | R mNRR2 <sup>a</sup> | CCATGATGACCCCCAGCAGG                     |
|                          | F mNRR2 <sup>D</sup> | AAAAAGCAGGCTCTCCTCCGTCGTTCCGGGGG         |
|                          | R mNRR2 <sup>D</sup> | AGAAAGCTGGGTTCTGGGCGTTTCTTGGACTCTC       |
| human Notch1 (NM_017617) | F hNRR1 <sup>a</sup> | ACGGGCTCTTGTGCCACATCC                    |
|                          | R hNRR1 <sup>a</sup> | CTTGCGGGACAGCAGCACC                      |
|                          | F hNRR1 <sup>D</sup> | AAACTCGAGGACTACAGCTTCGGGGGTG             |
|                          | R hNRR1 <sup>D</sup> | AAATGCGGCCGCGTGCAGCTGCGCCGGC             |
|                          | F hNRR1dS1           | pho-GAGCTGGACCCCATGGACG                  |
|                          | R hNRR1dS1           | pho-CCCACCCTCGCTGCCAC                    |
| Human Notch2 (NM_024408) | F hNRR2 <sup>a</sup> | CAGCTGCCACCCTCAGCG                       |
|                          | R hNRR2 <sup>a</sup> | TTTTGCCATGATTACCCCCAGCAG                 |
|                          | F hNRR2 <sup>D</sup> | AAACTCGAGACGGCACCCCCAGCAC                |
|                          | R hNRR2 <sup>a</sup> | AAATGCGGCCGCTGAGTGCGTTCTGGAGTCAG         |

**Table 1.** F = forward primer, R = reverse primer, <sup>a</sup>outer primer, <sup>b</sup>nested primer, pho = phosphorylated
