# Supplementary material for: Generation of anti-Notch antibodies and their application in blocking Notch signalling in neural stem cells
Source: PubMed Central journal article supplement (PMC3502869; doi:10.1016/j.ymeth.2012.07.008), 2012-09
Supplement: mmc8.pdf [file mmc8.pdf]

| Marker/gene               | Forward primer        | Reverse primer        | UPL probe |
|---------------------------|-----------------------|-----------------------|-----------|
| hGAPDH                    | ctctgctcctcctgttcgac  | acgaccaaattccgttgactc | 60        |
| hHES5                     | tacctgaagcacagcaaagc  | tagtctggtgcaggctctt   | 70        |
| hNOTCH1                   | cgcacaaaggtgtctccag   | ccctggcaatgtactgtgat  | 85        |
| hNOTCH2                   | tcggcagactggtgacttc   | acaggtgtcccttcaaac    | 8         |
| hNOTCH3                   | gccaagcggctaaaggta    | cactgacggcaatccaca    | 30        |
| hNOTCH4                   | aggccacagcaggatcac    | aggtggggccttcaaac     | 43        |
| hJAGGED1                  | gaatggcaacaaaacttgc   | agccttgtcggcaaatagc   | 42        |
| hJAGGED2                  | tgggactgggacaacgatac  | atgcgacactcgctcgat    | 17        |
| hDLL1                     | cttccccttcggcttcac    | gggtttctgttgcgaggt    | 2         |
| hDLL3                     | caactgtgagaagaggtgga  | ccaggtccaggcagagtc    | 46        |
| hDLL4                     | ccctggcaatgtactgtgat  | tgtgggtgcagtagttgag   | 23        |
| hDCX                      | catccccaacacctcagaag  | ggaggttccgtttgctga    | 78        |
| mGAPDH Taqman Probe (ABI) | Mm99999915_g1         |                       |           |
| mHes5                     | ccaaggagaaaaaccgactg  | tgctctatgctgctgttgatg | 22        |
| mNotch1                   | actatctcggcggctttc    | ggcactcgttgatctcctct  | 5         |
| mNotch2                   | tgctgtttgacaactttgagt | gtggctgcacagtatttgc   | 6         |
| mNotch3                   | agctgggtcctgaggtgat   | agacagagccggttgc      | 9         |
| mNotch4                   | ggacctgcttgaaccttc    | cctcacagagcctcccttc   | 34        |
| mJagged1                  | gaggcgtcctctgaaaaca   | acccaagccactgtaagaca  | 6         |
| mJagged2                  | gctttgtgatcgagcatcc   | cttgcagggtgaaagaca    | 10        |
| mDII1                     | ttcaactgtgagaagaatgat | gccgaggtccacacactt    | 103       |
| mDII3                     | tcgtacgttgcccttcc     | tgctctccaggtttcaatg   | 7         |
| mDII4                     | aggtgccacttcggttacac  | gggagagcaaatggctgata  | 106       |

**Supplementary Table 2.** Primer sequences and probes for qRT-PCR.
